# Supplementary material
Source: Springer Nature journal article supplement (https://www.springermedizin.de/resource/supplementary/13690_2011_34_MOESM3_ESM.pdf/9422430)
Supplement: MOESM3 [file 9422430]

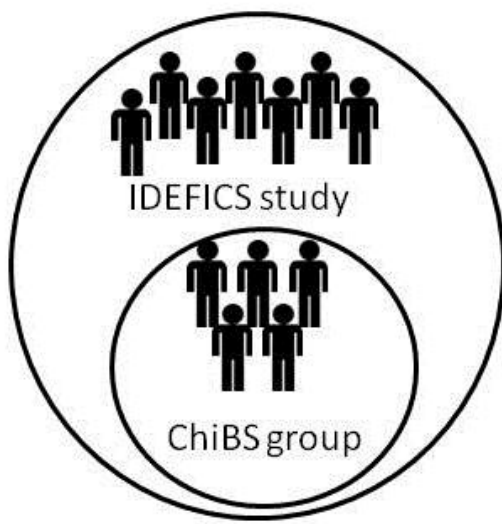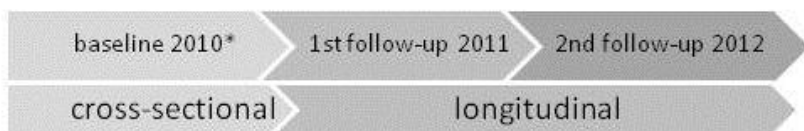

**Assessment of**

**Stress biomarkers**

Salivary cortisol

Hair cortisol

Serum cortisol

HRV

HRV

HRV

**Stress questionnaires**

CLES-C

CLES-C

CLES-C

CHS-CUS

CHS-CUS

Emotions

Emotions

Emotions

Coping

Coping

Coping

SDQ

SDQ

SDQ

**Antropometry**

BODPOD

BODPOD

BODPOD

Routine antropometry

Routine antropometry

**Diet**

CEHQ-FFQ

CEHQ-FFQ

CEHQ-FFQ

DEBQ

DEBQ
